# Supplementary material for: Effects of Soy-Based Infant Formula on Weight Gain and Neurodevelopment in an Autism Mouse Model
Source: MDPI journal article supplement (doi:10.3390/cells11081350), 2022-04-15
Supplement: s1 [file s1]

*Supplementary Figures*

# Effects of Soy-Based Infant Formula on Weight Gain and Neurodevelopment in an Autism Mouse Model

Cara J. Westmark <sup>1,2,\*</sup>, Mikolaj J. Filon <sup>1,3</sup>, Patricia Maina <sup>1,4</sup>, Lauren I. Steinberg <sup>1,3</sup>, Chrysanthi Ikonomidou <sup>1</sup>, and Pamela R. Westmark <sup>1</sup>

<sup>1</sup> Department of Neurology, University of Wisconsin, Madison, WI USA

<sup>2</sup> Molecular Environmental Toxicology Center, University of Wisconsin, Madison, WI USA

<sup>3</sup> Undergraduate Research Program, University of Wisconsin, Madison, WI USA

<sup>4</sup> Molecular Environmental Toxicology Summer Research Opportunities Program, University of Wisconsin, Madison, WI USA

\* Correspondence: westmark@wisc.edu; Tel.: 608-262-9730

**Supplementary Figure S1:** Body weights of juvenile WT and *Fmr1<sup>KO</sup>* female and male mice in response to rodent diets. Mice were weighed on postnatal day 21 (P21) immediately prior to seizure testing: female WT/D07030301 (n=45), female WT/Purina 5015 (n=26), female *Fmr1<sup>KO</sup>*/D07030301 (n=10), female *Fmr1<sup>KO</sup>*/Purina 5015 (n=24), male WT/D07030301 (n=80), male WT/Purina 5015 (n=29), male *Fmr1<sup>KO</sup>*/D07030301 (n=17), and male *Fmr1<sup>KO</sup>*/Purina 5015 (n=32). Statistics were determined by 2-way ANOVA: females interaction  $F(1,101)=2.296$ ,  $p=0.13$ ; genotype  $F(1,101)=8.500$ ,  $p=0.0044$ ; diet  $F(1,101)=8.989$ ,  $p<0.0034$ ; males interaction  $F(1,154)=3.590$ ,  $p=0.06$ ; genotype  $F(1,154)=3.323$ ,  $p=0.070$ ; diet  $F(1,154)=18.49$ ,  $p<0.0001$ ; and Tukey's multiple comparison tests denoted by  $p<0.05$  (\*) and  $p<0.01$  (\*\*).

**Supplementary Figure S2:** Body weights of adult WT female and male mice in response to rodent diets. C57BL/6J mice were maintained on Purina 5015 for 1 month and then transferred to D07030301 or left on the Purina 5015 for an additional 1 month. Mice were weighed at 2 months of age immediately prior to PTZ-induced seizure testing: female D07030301 (n=26), female Purina 5015 (n=20), male D07030301 (n=39) and male Purina 5015 (n=20). Statistics were determined by Student's t-tests: females ( $p=0.074$ ) and males ( $p=0.067$ ).

**Supplementary Figure S3:** EchoMRI measurements of total body weight, fat mass, lean mass, total water, and free water in female *Fmr1<sup>HET</sup>* and *Fmr1<sup>KO</sup>* and male WT and *Fmr1<sup>KO</sup>* mice as a function of Teklad 2019, CIF and SIF diets at age P62. Female cohorts included: *Fmr1<sup>HET</sup>*/Teklad 2019 (n=4), *Fmr1<sup>HET</sup>*/CIF (n=5), *Fmr1<sup>HET</sup>*/SIF (n=6), *Fmr1<sup>KO</sup>*/Teklad 2019 (n=6), *Fmr1<sup>KO</sup>*/CIF (n=7) and *Fmr1<sup>KO</sup>*/SIF (n=6). Male cohorts included: WT/Teklad 2019 (n=6), WT/CIF (n=6), WT/SIF (n=4), *Fmr1<sup>KO</sup>*/Teklad 2019 (n=6), *Fmr1<sup>KO</sup>*/CIF (n=5) and *Fmr1<sup>KO</sup>*/SIF (n=7). Statistics were determined by two-way ANOVA. Tukey's multiple comparison tests denoted by  $p<0.05$  (\*),  $p<0.01$  (\*\*),  $p<0.001$  (\*\*\*), and  $p<0.0001$  (\*\*\*\*).

**Supplementary Figure S4:** EchoMRI measurements of total body weight, fat mass, lean mass, total water, and free water in female *Fmr1<sup>HET</sup>* and *Fmr1<sup>KO</sup>* and male WT and *Fmr1<sup>KO</sup>* mice as a function of Teklad 2019, CIF and SIF diets at age P76. Female cohorts included: *Fmr1<sup>HET</sup>*/Teklad 2019 (n=4), *Fmr1<sup>HET</sup>*/CIF (n=4), *Fmr1<sup>HET</sup>*/SIF (n=6), *Fmr1<sup>KO</sup>*/Teklad 2019 (n=6), *Fmr1<sup>KO</sup>*/CIF (n=7) and *Fmr1<sup>KO</sup>*/SIF (n=6). Male cohorts included: WT/Teklad 2019 (n=6), WT/CIF (n=6), WT/SIF (n=4), *Fmr1<sup>KO</sup>*/Teklad 2019 (n=6), *Fmr1<sup>KO</sup>*/CIF (n=5) and *Fmr1<sup>KO</sup>*/SIF (n=7). Statistics were determined by two-way ANOVA. Tukey's multiple comparison tests denoted by  $p<0.05$  (\*),  $p<0.01$  (\*\*), and  $p<0.001$  (\*\*\*).

**Supplementary Figure S5:** Infant feeding during the first 3 months of life is associated with growth metrics at 12 months of age. (A) Cohorts included females fed breast milk (n=218), cow milk formula (n=240) and soy-based infant formula (n=15) and males fed breast milk (n=201), cow milk formula (n=215) and soy-based infant formula (n=21). Statistics were determined by two-way ANOVA body weight interaction  $F(2,706)=0.4863$ ,  $P=0.61$ ; diet  $F(2,706)=17.37$ ,  $P<0.0001$ ; sex  $F(1,706)=25.00$ ,  $P<0.0001$ ; height interaction  $F(2,512)=0.1625$ ,  $P=0.85$ ; diet  $F(2,512)=2.697$ ,  $P=0.0683$ ; sex  $F(1,512)=4.169$ ,  $P=0.0417$ ; and BMI interaction  $F(2,511)=0.06707$ ,  $P=0.94$ ; diet  $F(2,511)=6.485$ ,  $P=0.0017$ ; sex  $F(1,511)=1.609$ ,  $P=0.2052$ .

**Supplementary Figure S6:** Infant feeding during the first 3 months of life is associated with growth metrics at 6 years of age. (A) Cohorts included females fed breast milk (n=218), cow milk formula (n=240) and soy-based infant formula (n=15) and males fed breast milk (n=201), cow milk formula (n=215) and soy-based infant formula (n=21). Statistics were determined by two-way ANOVA body weight interaction  $F(2,870)=0.9167$ ,  $P=0.40$ ; diet  $F(2,870)=10.66$ ,  $P<0.0001$ ; sex  $F(1,870)=1.075$ ,  $P=0.30$ ; height interaction  $F(2,848)=0.4322$ ,  $P=0.65$ ; diet  $F(2,848)=7.895$ ,  $P=0.4544$ ; sex  $F(1,848)=2.45$ ,  $P=0.12$ ; and BMI interaction  $F(2,826)=1.163$ ,  $P=0.31$ ; diet  $F(2,826)=7.812$ ,  $P=0.0004$ ; sex  $F(1,826)=3.08E-6$ ,  $P=0.999$ .

Supplementary Figure S1: Juvenile Mice

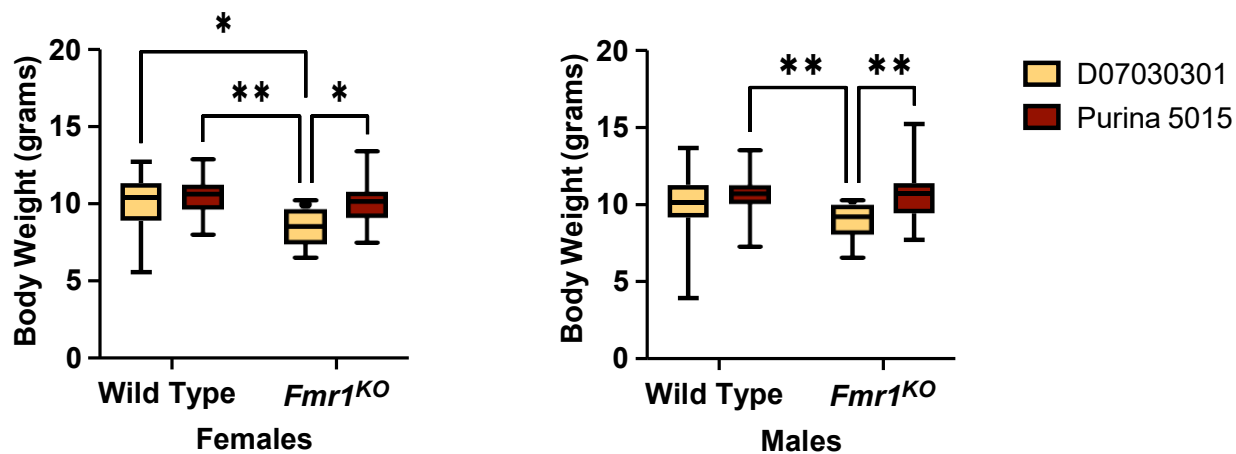

Supplementary Figure S2

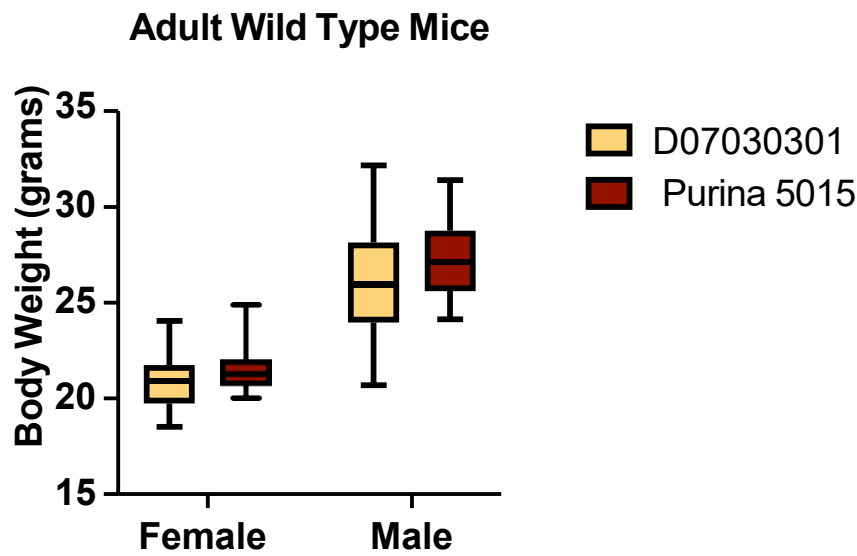

Supplementary Figure S3

2019

CIF

SIF

Females Body Weight

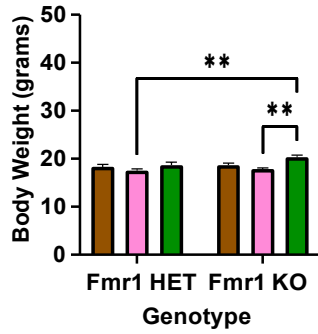

Males Body Weight

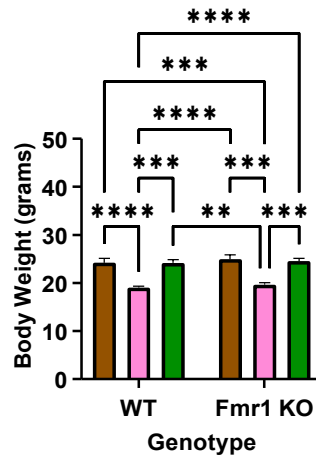

Females Fat

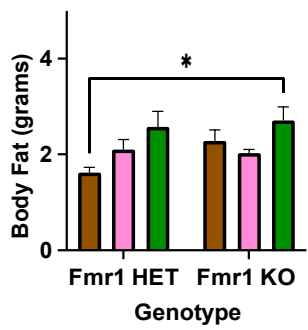

Males Fat

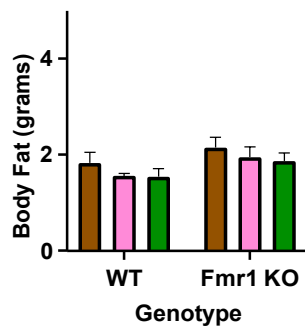

Females Lean

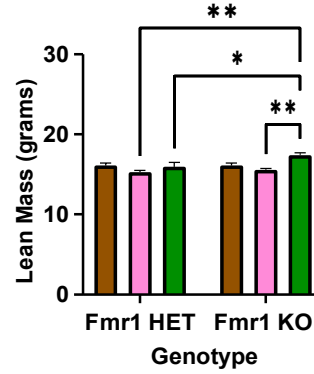

Males Lean

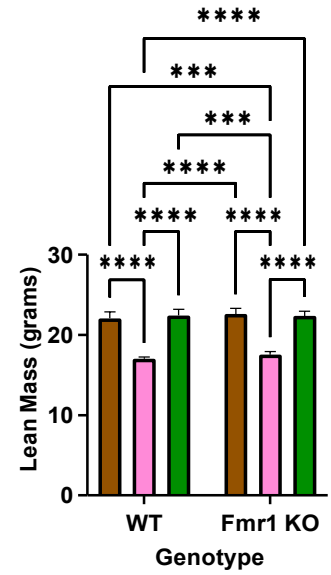

Males Total Water

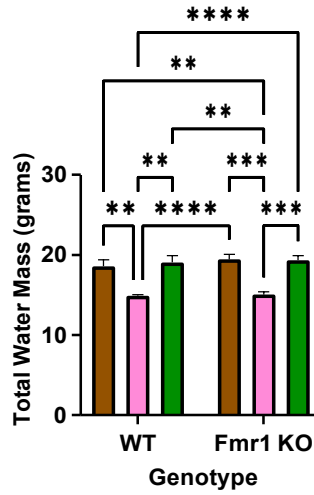

Females Total Water

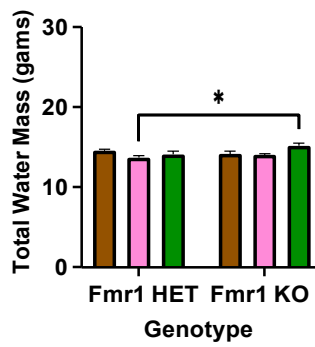

Females Free Water

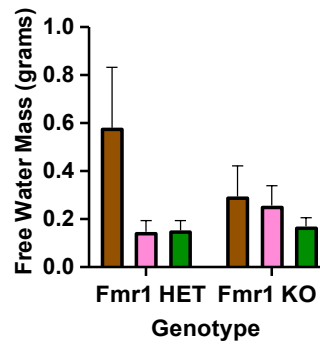

Males Free Water

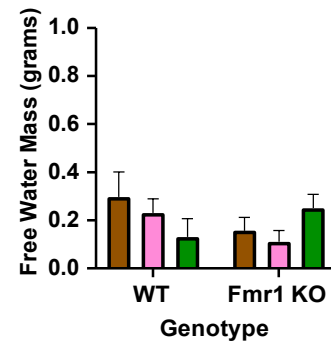

Supplementary Figure S4

2019

CIF

SIF

Females Body Weight

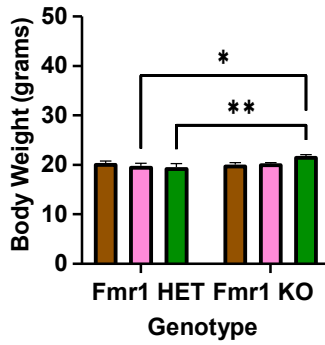

Males Body Weight

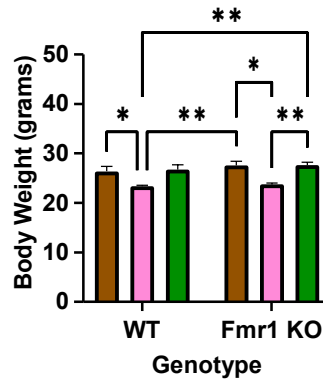

Females Fat

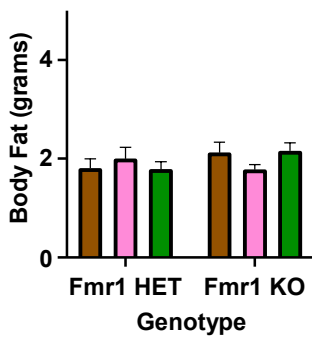

Males Fat

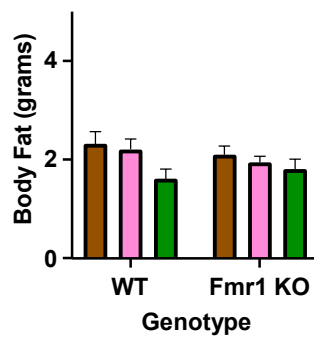

Females Lean

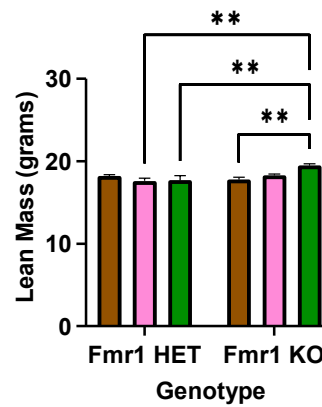

Males Lean

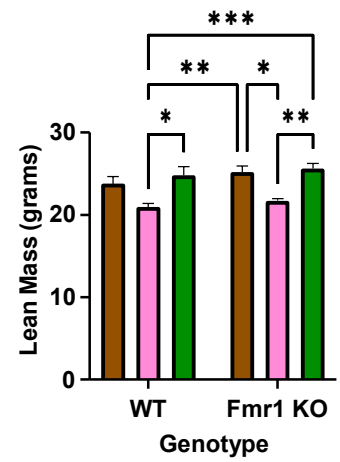

Females Total Water

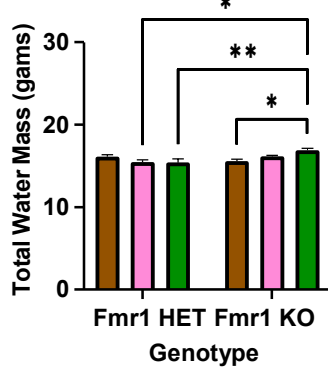

Males Total Water

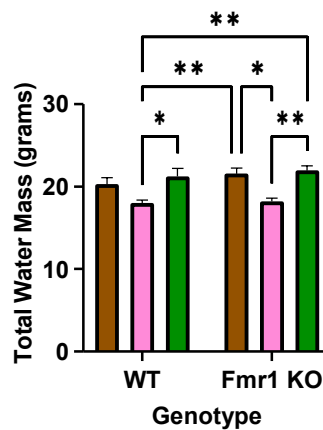

Females Free Water

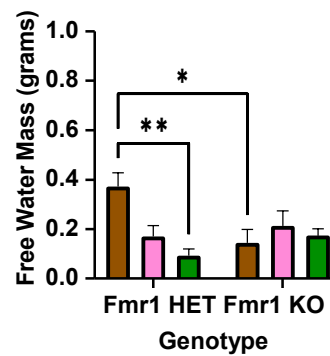

Males Free Water

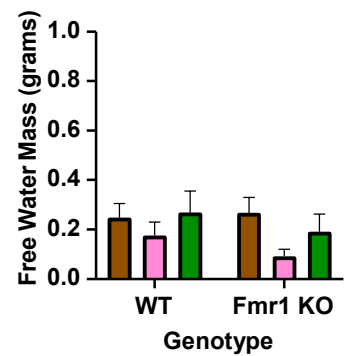

Supplementary Figure S5

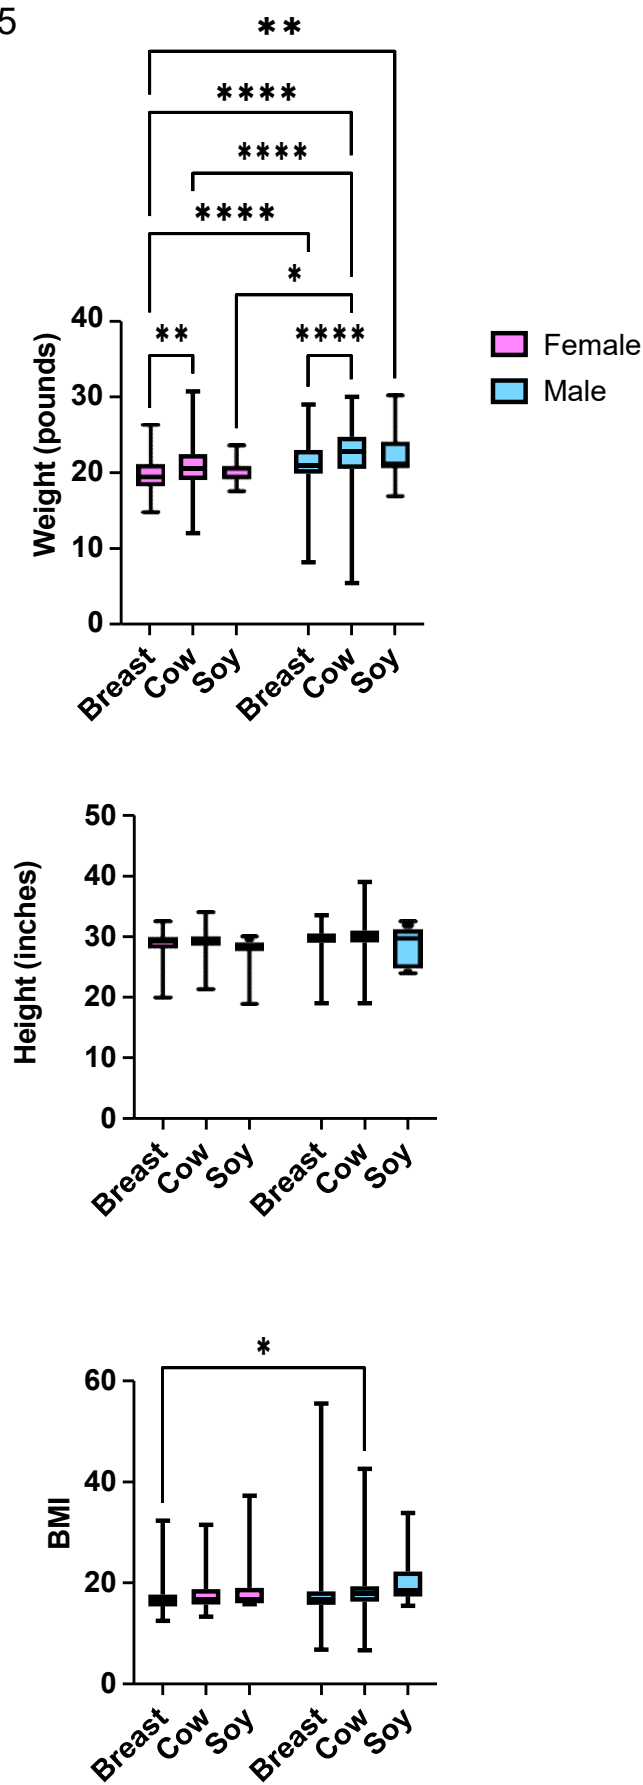

Supplementary Figure S6

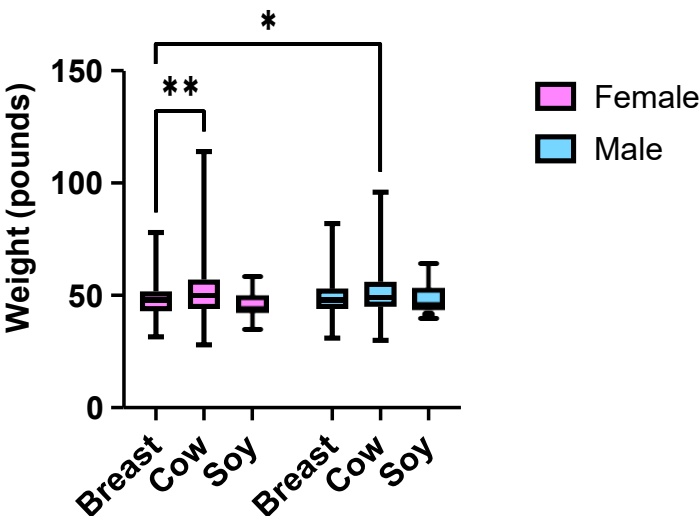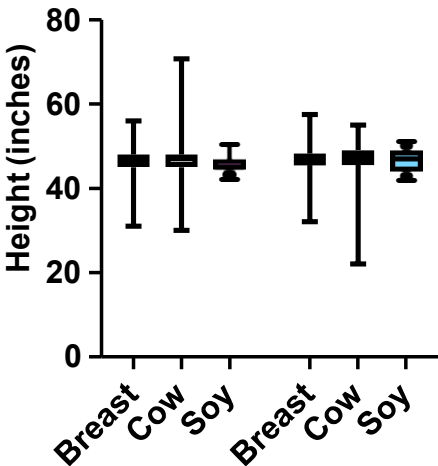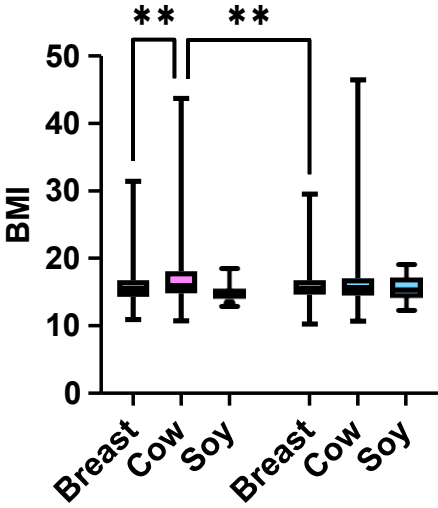



*Supplementary Tables*

# Effects of Soy-Based Infant Formula on Weight Gain and Neurodevelopment in an Autism Mouse Model

Cara J. Westmark <sup>1,2,\*</sup>, Mikolaj J. Filon <sup>1,3</sup>, Patricia Maina <sup>1,4</sup>, Lauren I. Steinberg <sup>1,3</sup>, Chrysanthi Ikonomidou <sup>1</sup>, and Pamela R. Westmark <sup>1</sup>

<sup>1</sup> Department of Neurology, University of Wisconsin, Madison, WI USA

<sup>2</sup> Molecular Environmental Toxicology Center, University of Wisconsin, Madison, WI USA

<sup>3</sup> Undergraduate Research Program, University of Wisconsin, Madison, WI USA

<sup>4</sup> Molecular Environmental Toxicology Summer Research Opportunities Program, University of Wisconsin, Madison, WI USA

\* Correspondence: westmark@wisc.edu; Tel.: 608-262-9730

| <b>Supplementary Table S1: Composition of Purified Ingredient Diets.</b> |                                       |                              |
|--------------------------------------------------------------------------|---------------------------------------|------------------------------|
|                                                                          | <b>D07030301<br/>Modified AIN-76A</b> | <b>D10012G<br/>(AIN-93G)</b> |
| Protein                                                                  | 18%                                   | 20%                          |
| Carbohydrate                                                             | 55.5%                                 | 64%                          |
| Fat                                                                      | 11.6%                                 | 7%                           |
|                                                                          |                                       |                              |
| <b>Ingredient</b>                                                        | <b>grams</b>                          | <b>grams</b>                 |
| Casein                                                                   | 180                                   | 200                          |
| L-Cystine                                                                | 3                                     | 3                            |
| Corn Starch                                                              | 431                                   | 397                          |
| Maltodextrin 10                                                          | 125                                   | 132                          |
| Inulin                                                                   | 25                                    | 0                            |
| Sucrose                                                                  | 0                                     | 100                          |
| Cellulose, BW200                                                         | 75                                    | 50                           |
| Soybean Oil                                                              | 118                                   | 70                           |
| t-Butylhydroquinone                                                      | 0                                     | 0.014                        |
| Choline Bitartrate                                                       | 2                                     | 2.5                          |
| <b>Vitamins &amp; Minerals</b>                                           |                                       |                              |
| Vitamin A, Acetate (500,000 IU/gm)                                       | 4000 IU                               | 4000 IU                      |
| Vitamin D3 (100,000 IU/gm)                                               | 1000 IU                               | 1000 IU                      |
| Vitamin E Acetate (500 IU/gm)                                            | 50 IU                                 | 75 IU                        |
| Menadione Sodium Bisulfite<br>(62.5% Menadione)                          | 0.5 mg                                | 0 mg                         |
| Phylloquinone                                                            | 0 mg                                  | 0.75 mg                      |
| Biotin, 1.0%                                                             | 0.2 mg                                | 0.2 mg                       |
| Cyanocobalamin, 0.1%                                                     | 10 mcg                                | 25 mcg                       |
| Folic Acid                                                               | 2 mg                                  | 2 mg                         |
| Nicotinic Acid                                                           | 30 mg                                 | 30 mg                        |
| Calcium Pantothenate                                                     | 16 mg                                 | 16 mg                        |
| Pyridoxine-HCl                                                           | 7 mg                                  | 7 mg                         |
| Riboflavin                                                               | 6 mg                                  | 6 mg                         |
| Thiamin HCl                                                              | 6 mg                                  | 6 mg                         |
| Calcium Phosphate, Dibasic<br>(29.5% Ca, 22.8% P)                        | 6 g                                   | 0 g                          |
| Calcium Carbonate (39.3%, 40.0% Ca)                                      | 3.0 g                                 | 5.0 g                        |
| Potassium Phosphate, Monobasic<br>(28.7% K, 22.8%P)                      | 0 g                                   | 1.56 g                       |
| Potassium Citrate ⋅ 1 H <sub>2</sub> O (36.2% K)                         | 6.0 g                                 | 3.6 g                        |
| Potassium Sulfate (44.9% K, 18.4% S)                                     | 0 g                                   | 0.3 g                        |
| Magnesium Oxide (60.3 Mg)                                                | 0.5 g                                 | 0.5 g                        |
| Magnesium Sulfate ⋅ 7 H <sub>2</sub> O<br>(9.87% Mg, 13.0% S)            | 0.33 g                                | 0 g                          |
| Sodium Chloride (39.3% Na, 60.7% Cl)                                     | 1.0 g / 1.6 g                         | 1.0 g, 1.6 g                 |
| Cupric Carbonate (57.5% Cu)                                              | 6.0 mg                                | 6.0 mg                       |
| Potassium Iodate (59.3% I)                                               | 0.2 mg                                | 0.2 mg                       |
| Ferric Citrate (21.2 %, 17.4% Fe)                                        | 45 mg                                 | 37 mg                        |
| Manganese Carbonate (47.8% Mn)                                           | 59 mg                                 | 10.5 mg                      |
| Sodium Selenate (45.7%, 41.8% Se)                                        | 0.16                                  | 0.2 mg                       |
| Zinc Carbonate (52.1%, 25.1% Zn)                                         | 29 mg                                 | 30 mg                        |
| Chromium K Sulfate ⋅ 12 H <sub>2</sub> O (10.4% Cr)                      | 2.0 mg                                | 962.5 mcg                    |
| Ammonium Molybdate ⋅ 4 H <sub>2</sub> O<br>(54.3% Mo)                    | 1.6 mg                                | 151.1 mcg                    |
| Sodium Fluoride (45.2% F)                                                | 0.9 mg                                | 1 mg                         |

**Supplementary Table S2: Composition of Casein- and Soy-Based Infant Formula Diets Formulated for Mice.**

| <b>Ingredient</b>                            | <b>D14010401 / SIF<br/>Enfamil<br/>ProSobee</b> | <b>D14010402 / CIF<br/>Enfamil Premium</b> |
|----------------------------------------------|-------------------------------------------------|--------------------------------------------|
|                                              | <b>grams</b>                                    | <b>grams</b>                               |
| Enfamil ProSobee                             | 1000                                            | 0                                          |
| Enfamil Premium                              | 0                                               | 1000                                       |
| DL-Methionine                                | 3                                               | 3                                          |
| DiCalcium Phosphate                          | 0                                               | 4                                          |
| Calcium Carbonate                            | 1.5                                             | 2                                          |
| Magnesium Oxide                              | 0.2                                             | 0.2                                        |
| Copper Carbonate                             | 0.005                                           | 0.005                                      |
| Manganous Carbonate                          | 0.03                                            | 0.03                                       |
| Ammonium Molybdate                           | 0.0004                                          | 0.0004                                     |
| Menadione Sodium Bisulfite (62.5% Menadione) | 0.001                                           | 0.001                                      |
| Biotin                                       | 0.0001                                          | 0.0001                                     |
| Pyridoxine HCL                               | 0.006                                           | 0.006                                      |
| Riboflavin                                   | 0.004                                           | 0.004                                      |
| Thiamin HCL (80% Thiamin)                    | 0.002                                           | 0.002                                      |
| Choline Bitartrate                           | 2                                               | 2                                          |
| FD&C Blue Dye #1                             | 0.05                                            | 0                                          |
| FD&C Red Dye #40                             | 0                                               | 0.05                                       |

**Supplementary Table S3: Micronutrient Content of Infant Formula Diets Formulated for Mice.**

| <b>Micronutrient (per kg diet)</b> | <b>NRC<br/>Recommended<sup>1</sup></b> | <b>SIF<br/>D14010401<br/>Enfamil ProSobee</b> | <b>CIF<br/>D14010402<br/>Enfamil Premium</b> |
|------------------------------------|----------------------------------------|-----------------------------------------------|----------------------------------------------|
| Vitamin A (IU)                     | 2400 IU                                | 16190 IU                                      | 15950 IU                                     |
| Vitamin D (IU)                     | 1000 IU                                | 3278 IU                                       | 3194 IU                                      |
| Vitamin E (IU)                     | 32 IU                                  | 109 IU                                        | 109 IU                                       |
| Vitamin K (mg)                     | 1 mg                                   | 1.1 mg                                        | 1.1 mg                                       |
| Biotin (mg)                        | 0.2 mg                                 | 0.21 mg                                       | 0.21 mg                                      |
| B12 (mg)                           | 0.01 mg                                | 0.02 mg                                       | 0.02 mg                                      |
| Folic Acid (mg)                    | 0.5 mg                                 | 0.9 mg                                        | 0.9 mg                                       |
| Niacin (mg)                        | 15 mg                                  | 53.6 mg                                       | 53.4 mg                                      |
| Pantothenate (Ca) (mg)             | 16 mg                                  | 26.8 mg                                       | 26.7 mg                                      |
| B6 (Pyridoxine-HCl) (mg)           | 8 mg                                   | 8.9 mg                                        | 8.9 mg                                       |
| Riboflavin (mg)                    | 7 mg                                   | 8.9 mg                                        | 11.4 mg                                      |
| Thiamin-HCl (mg)                   | 5 mg                                   | 5.9 mg                                        | 5.8 mg                                       |
| Methionine (g)                     | 5 g                                    | 3.0 g                                         | 3.0 g                                        |
| Sodium (g)                         | 0.5 g                                  | 2.0 g                                         | 1.5 g                                        |
| Chloride (g)                       | 0.5 g                                  | 4.3 g                                         | 3.4 g                                        |
| Calcium (g)                        | 5 g                                    | 6.2 g                                         | 6.1 g                                        |
| Phosphorus (g)                     | 3 g                                    | 3.7 g                                         | 3.2 g                                        |
| Potassium (g)                      | 2 g                                    | 6.5 g                                         | 5.7 g                                        |
| Magnesium (g)                      | 0.5 g                                  | 0.5 g                                         | 0.5 g                                        |
| Sulfur (g)                         | ND                                     | 0.0 g                                         | 0.0 g                                        |
| Chromium mg)                       | ND                                     | 0.0 mg                                        | 0.0 mg                                       |
| Copper (mg)                        | 6 mg                                   | 6.9 mg                                        | 6.8 mg                                       |
| Fluoride (mg)                      | ND                                     | 0.0 mg                                        | 0.0 mg                                       |
| Iodine (mg)                        | 0.15 mg                                | 0.8 mg                                        | 0.8 mg                                       |
| Iron (mg)                          | 35 mg                                  | 99.3 mg                                       | 98.9 mg                                      |
| Manganese (mg)                     | 10 mg                                  | 15.6 mg                                       | 15.0 mg                                      |
| Molybdenum (mg)                    | 0.15 mg                                | 0.22 mg                                       | 0.21 mg                                      |
| Selenium (mg)                      | 0.15 mg                                | 0.15 mg                                       | 0.15 mg                                      |
| Zinc (mg)                          | 10 mg                                  | 64.6 mg                                       | 53.4 mg                                      |
| Choline Bitartrate (g)             | 2 g                                    | 3.3 g                                         | 3.3 g                                        |

<sup>1</sup>NRC Guidelines as described in Nutrient Requirements of Laboratory Animals, 4<sup>th</sup> Revised Edition, 1995. Subcommittee on Laboratory Animal Nutrition, Board on Agriculture, National Research Council, National Academy Press, Washington, D.C.

| Supplementary Table S 4: Body Weights in Juvenile Mice Dependent on Infant Formula Diets. |      |    |             |
|-------------------------------------------------------------------------------------------|------|----|-------------|
| Strain / Gender                                                                           | Diet | n  | Weight (g)  |
| WT / Female                                                                               | CIF  | 0  | ND          |
|                                                                                           | SIF  | 3  | 8.07 ± 0.23 |
| WT / Male                                                                                 | CIF  | 10 | 7.75 ± 0.35 |
|                                                                                           | SIF  | 0  | ND          |
| <i>Fmr1</i> <sup>KO</sup> / Female                                                        | CIF  | 5  | 7.52 ± 0.47 |
|                                                                                           | SIF  | 5  | 6.70 ± 0.35 |
| <i>Fmr1</i> <sup>KO</sup> / Male                                                          | CIF  | 9  | 7.49 ± 0.25 |
|                                                                                           | SIF  | 7  | 6.73 ± 0.53 |

| Supplementary Table S5: Diet Dependent Differential Expression of RayBiotech Array 4 Proteins in WT and <i>Fmr1<sup>KO</sup></i> Plasma. |                |                 |                |                    |                |                |                    |              |              |
|------------------------------------------------------------------------------------------------------------------------------------------|----------------|-----------------|----------------|--------------------|----------------|----------------|--------------------|--------------|--------------|
| Protein                                                                                                                                  | WT (pg/mL, SD) |                 |                | Fmr1KO (pg/mL, SD) |                |                | 2-Way ANOVA, F (P) |              |              |
|                                                                                                                                          | 2019           | CIF             | SIF            | 2019               | CIF            | SIF            | Interaction        | Diet         | Genotype     |
| Axl                                                                                                                                      | 6,030 (862)    | 12,200 (2,660)  | 10,600 (2,560) | 8,020 (1,170)      | 9,600 (1,280)  | 7,440 (1,050)  | 3.89 (≤0.05)       | 7.31 (≤0.01) | 2.31 (ns)    |
| CD30                                                                                                                                     | 175 (22.1)     | 237 (10.4)      | 254 (46.7)     | 182 (35.5)         | 250 (20.8)     | 206 (30.9)     | 1.88 (ns)          | 7.81 (≤0.01) | 0.43 (ns)    |
| CXCL 16                                                                                                                                  | 505 (89.1)     | 475 (6.2)       | 470 (43.7)     | 533 (53.1)         | 432 (35.4)     | 408 (44.9)     | 1.27 (ns)          | 4.09 (≤0.05) | 1.11 (ns)    |
| EGF                                                                                                                                      | 52.5 (12.6)    | 46.1 (5.9)      | 45.1 (3.2)     | 36.7 (2.2)         | 43.6 (6.3)     | 38.2 (6.0)     | 1.45 (ns)          | 0.40 (ns)    | 6.70 (≤0.03) |
| Fractalkine                                                                                                                              | 4,130 (708)    | 2,820 (1,980)   | 4,090 (171)    | 3,530 (555)        | 3,160 (456)    | 3,470 (895)    | 0.47 (ns)          | 1.39 (ns)    | 0.40 (ns)    |
| IGFBP-2                                                                                                                                  | 7,520 (4,670)  | 28,800 (15,100) | 9,520 (4,210)  | 21,000 (11,570)    | 8,990 (2,370)  | 11,900 (5,130) | 5.97 (≤0.02)       | 1.40 (ns)    | 0.11 (ns)    |
| IGFBP-5                                                                                                                                  | 10,500 (1,730) | 11,900 (1,820)  | 11,500 (1,430) | 13,800 (2,490)     | 8,710 (1,400)  | 12,000 (1,500) | 5.08 (≤0.03)       | 1.81 (ns)    | 0.060 (ns)   |
| IL-2 Ra                                                                                                                                  | 366 (27.0)     | 522 (29.6)      | 509 (126)      | 351 (69.9)         | 622 (202)      | 414 (31.0)     | 1.35 (ns)          | 6.40 (≤0.02) | 0.0047 (ns)  |
| IL-20                                                                                                                                    | 177 (93.9)     | 103 (69.0)      | 252 (192)      | 233 (183)          | 608 (581)      | 597 (667)      | 0.54 (ns)          | 0.52 (ns)    | 2.84 (ns)    |
| MDC                                                                                                                                      | 169 (17.6)     | 199 (69.7)      | 229 (90.4)     | 184 (67.1)         | 159 (25.6)     | 142 (24.3)     | 1.23 (ns)          | 0.041 (ns)   | 1.97 (ns)    |
| MIP-3a                                                                                                                                   | 35.9 (32.1)    | 73.4 (64.6)     | 24.0 (30.6)    | 7.5 (2.9)          | 118 (141)      | 21.8 (25.2)    | 0.46 (ns)          | 2.43 (ns)    | 0.022 (ns)   |
| OPN                                                                                                                                      | 29,600 (5,070) | 32,800 (9,320)  | 27,400 (6,620) | 32,100 (4,860)     | 32,000 (7,880) | 33,100 (5,060) | 0.36 (ns)          | 0.17 (ns)    | 0.61 (ns)    |
| OPG                                                                                                                                      | 928 (169)      | 1,450 (696)     | 1,660 (1,110)  | 903 (419)          | 929 (296)      | 636 (170)      | 1.10 (ns)          | 0.39 (ns)    | 3.63 (ns)    |
| Prolactin                                                                                                                                | 1,640 (508)    | 2,290 (1,960)   | 2,390 (2,070)  | 1,890 (1,150)      | 6,810 (726)    | 4,800 (3,140)  | 2.04 (ns)          | 3.59 (ns)    | 7.70 (≤0.02) |
| Pro-MMP-9                                                                                                                                | 3,130 (1,760)  | 3,300 (1,240)   | 2,620 (2,700)  | 3,490 (3,870)      | 2,440 (752)    | 1,620 (852)    | 0.18 (ns)          | 0.46 (ns)    | 0.24 (ns)    |
| VEGF                                                                                                                                     | 88.5 (12.4)    | 52.1 (39.0)     | 36.3 (39.4)    | 67.5 (7.1)         | 213 (198)      | 50.4 (31.0)    | 1.93 (ns)          | 1.68 (ns)    | 1.64 (ns)    |

| Supplementary Table S6: Diet Dependent Differential Expression of RayBiotech Array 5 Proteins in WT and <i>Fmr1<sup>KO</sup></i> Plasma. |                |             |             |                    |             |             |                      |                      |                      |
|------------------------------------------------------------------------------------------------------------------------------------------|----------------|-------------|-------------|--------------------|-------------|-------------|----------------------|----------------------|----------------------|
| Protein                                                                                                                                  | WT (pg/mL, SD) |             |             | Fmr1KO (pg/mL, SD) |             |             | 2-Way ANOVA, F (P)   |                      |                      |
|                                                                                                                                          | 2019           | CIF         | SIF         | 2019               | CIF         | SIF         | Interaction          | Diet                 | Genotype             |
| bFGF                                                                                                                                     | 83.9 (2.31)    | 50.0 (31.4) | 65.5 (20.7) | 63.3 (25.2)        | 90.8 (14.1) | 98.2 (12.4) | 4.16 ( $\leq 0.05$ ) | 0.52 (ns)            | 3.49 (ns)            |
| BLC                                                                                                                                      | 254 (67.2)     | 221 (34.8)  | 180 (30.8)  | 122 (17.0)         | 161 (26.4)  | 161 (34.6)  | 3.33 (ns)            | 0.50 (ns)            | 15.1 ( $\leq 0.00$ ) |
| Eotaxin                                                                                                                                  | 554 (33.3)     | 544 (9.0)   | 629 (95.3)  | 590 (25.0)         | 617 (172)   | 641 (76.1)  | 0.18 (ns)            | 0.91 (ns)            | 0.95 (ns)            |
| Eotaxin-2                                                                                                                                | 60.6 (12.9)    | 76.6 (27.1) | 60.6 (24.2) | 60.9 (17.0)        | 40.6 (9.2)  | 51.0 (12.2) | 1.58 (ns)            | 0.11 (ns)            | 3.06 (ns)            |
| ICAM-1                                                                                                                                   | 344 (312)      | 2090 (902)  | 568 (37.1)  | 985 (588)          | 564 (281)   | 516 (116)   | 8.16 ( $\leq 0.01$ ) | 4.75 ( $\leq 0.03$ ) | 1.95 (ns)            |
| IL-12p40                                                                                                                                 | 53.7 (42.6)    | 40.3 (20.3) | 96.7 (117)  | 63.2 (10.2)        | 82.9 (97.4) | 63.0 (39.1) | 0.49 (ns)            | 0.18 (ns)            | 0.038 (ns)           |
| Leptin                                                                                                                                   | 375 (334)      | 241 (216)   | 2130 (732)  | 293 (232)          | 1210 (958)  | 1160 (1360) | 2.41 (ns)            | 4.64 ( $\leq 0.04$ ) | 0.0059 (ns)          |
| MCP-5                                                                                                                                    | 17.3 (2.74)    | 18.7 (4.1)  | 68.8 (86.7) | 23.3 (15.5)        | 23.9 (3.8)  | 16.7 (5.6)  | 1.28 (ns)            | 0.74 (ns)            | 0.64 (ns)            |
| PF4                                                                                                                                      | 2380 (157)     | 2850 (509)  | 2300 (336)  | 2370 (578)         | 2430 (355)  | 2680 (379)  | 1.44 (ns)            | 0.64 (ns)            | 0.0075 (ns)          |

| Supplementary Table S7: Diet Dependent Differential Expression of RayBiotech Array 6 Proteins in WT and <i>Fmr1</i> <sup>KO</sup> Plasma. |                |               |               |                    |               |               |                    |              |              |
|-------------------------------------------------------------------------------------------------------------------------------------------|----------------|---------------|---------------|--------------------|---------------|---------------|--------------------|--------------|--------------|
| Protein                                                                                                                                   | WT (pg/mL, SD) |               |               | Fmr1KO (pg/mL, SD) |               |               | 2-Way ANOVA, F (P) |              |              |
|                                                                                                                                           | 2019           | CIF           | SIF           | 2019               | CIF           | SIF           | Interaction        | Diet         | Genotype     |
| CD40L                                                                                                                                     | 1,310 (366)    | 1,350 (610)   | 1,270 (563)   | 1,610 (244)        | 1,910 (1,390) | 803 (671)     | 0.79 (ns)          | 1.03 (ns)    | 0.14 (ns)    |
| Dkk-1                                                                                                                                     | 4,070 (957)    | 3,580 (790)   | 3,610 (1,250) | 4,380 (991)        | 4,360 (1,840) | 3,110 (1,530) | 0.38 (ns)          | 0.72 (ns)    | 0.11 (ns)    |
| Endoglin                                                                                                                                  | 462 (135)      | 378 (170)     | 416 (257)     | 398 (117)          | 267 (297)     | 254 (122)     | 0.094 (ns)         | 0.54 (ns)    | 1.48 (ns)    |
| Fcg RIIB                                                                                                                                  | 3,940 (1,180)  | 4,130 (675)   | 3,910 (621)   | 3,260 (918)        | 3,570 (975)   | 3,080 (736)   | 0.036 (ns)         | 0.26 (ns)    | 2.81 (ns)    |
| Fit-3L                                                                                                                                    | 2,250 (181)    | 2,100 (296)   | 2,100 (251)   | 1,860 (113)        | 2,230 (184)   | 1,990 (184)   | 2.31 (ns)          | 0.60 (ns)    | 1.56 (ns)    |
| Galectin-1                                                                                                                                | 8,880 (1,320)  | 6,780 (3,350) | 7,740 (4,460) | 10,300 (3,230)     | 7,560 (3,900) | 5,210 (2,730) | 0.61 (ns)          | 1.46 (ns)    | 0.0050 (ns)  |
| HAI-1                                                                                                                                     | 1,100 (358)    | 2,840 (1,440) | 2,180 (1,050) | 1,420 (679)        | 1,360 (360)   | 1,220 (326)   | 1.93 (ns)          | 1.59 (ns)    | 3.37 (ns)    |
| HGF R                                                                                                                                     | 2,120 (494)    | 3,890 (1,050) | 2,470 (1,530) | 5,540 (3,280)      | 1,820 (910)   | 2,040 (1,340) | 4.19 (≤0.05)       | 1.33 (ns)    | 0.15 (ns)    |
| IL-1 R4                                                                                                                                   | 318 (84.1)     | UL            | UL            | 321 (48.4)         | UL            | UL            | 0.83 (0.46)        | 5.56 (≤0.02) | 0.11 (0.75)  |
| IL-3 Rb                                                                                                                                   | 1,210 (285)    | UL            | UL            | 1,250 (105)        | UL            | UL            | 0.020 (ns)         | 0.65 (ns)    | 0.00020 (ns) |
| JAM-A                                                                                                                                     | 1,210 (309)    | 1,600 (234)   | 1,290 (126)   | 1,020 (266)        | 1,320 (122)   | 871 (338)     | 0.33 (ns)          | 4.33 (≤0.04) | 6.48 (≤0.03) |
| Leptin R                                                                                                                                  | 599 (175)      | 2,180 (1,160) | 1,580 (795)   | 628 (315)          | 899 (151)     | 1,180 (554)   | 1.65 (ns)          | 3.62 (ns)    | 3.36 (ns)    |
| MadCAM-1                                                                                                                                  | 367 (215)      | 1,040 (452)   | 700 (204)     | 733 (683)          | 519 (99.0)    | 731 (258)     | 2.16 (ns)          | 0.60 (ns)    | 0.055 (ns)   |
| MFG-E8                                                                                                                                    | 1,490 (1,040)  | 2,790 (171)   | 643 (228)     | 1,580 (969)        | 585 (89.3)    | 1,780 (1,360) | 6.64 (≤0.02)       | 0.54 (ns)    | 0.72 (ns)    |
| Neprilysin                                                                                                                                | 1,040 (345)    | 1,140 (996)   | 4,550 (1,820) | 899 (222)          | 969 (208)     | 2,200 (780)   | 2.82 (ns)          | 13.1 (≤0.00) | 4.15 (ns)    |
| RAGE                                                                                                                                      | 2,440 (1,300)  | 984 (1,220)   | 2,440 (1,860) | 2,950 (837)        | 1,210 (1,640) | 911 (878)     | 1.02 (ns)          | 2.18 (ns)    | 0.17 (ns)    |
| TROY                                                                                                                                      | 618 (90.2)     | 551 (59.5)    | 605 (188)     | 599 (21.0)         | 530 (246)     | 381 (247)     | 0.74 (ns)          | 0.72 (ns)    | 1.24 (ns)    |
| VEGF R1                                                                                                                                   | 255 (103)      | 154 (60.9)    | 246 (204)     | 260 (170)          | 275 (224)     | 77.4 (134)    | 1.25 (ns)          | 0.54 (ns)    | 0.036 (ns)   |



Supplementary Table S8: Diet Dependent Differential Expression of RayBiotech Array 7 Proteins in WT and *Fmr1*<sup>KO</sup> Plasma.

| Protein      | WT (pg/mL, SD)  |                 |                 | Fmr1KO (pg/mL, SD) |                 |                 | 2-Way ANOVA, F (P) |              |              |
|--------------|-----------------|-----------------|-----------------|--------------------|-----------------|-----------------|--------------------|--------------|--------------|
|              | 2019            | CIF             | SIF             | 2019               | CIF             | SIF             | Interaction        | Diet         | Genotype     |
| B7-1         | 403 (66.2)      | 597 (92.5)      | 822 (104)       | 216 (34.3)         | 857 (523)       | 471 (91.6)      | 2.93 (ns)          | 5.76 (≤0.02) | 0.76 (ns)    |
| BAFF R       | 362 (46.9)      | 304 (151)       | 206 (148)       | 200 (134)          | 318 (258)       | 338 (172)       | 1.22 (ns)          | 0.093 (ns)   | 0.0048 (ns)  |
| BTC          | 81.2 (62.5)     | 141 (74.3)      | 166 (92.0)      | 38.3 (21.5)        | 94.6 (53.7)     | 164 (100)       | 0.18 (ns)          | 3.20 (ns)    | 0.80 (ns)    |
| C5a          | 710 (68.9)      | 756 (138)       | 733 (147)       | 646 (144)          | 709 (110)       | 767 (313)       | 0.14 (ns)          | 0.29 (ns)    | 0.10 (ns)    |
| CCL6         | 2,410 (687)     | 2,380 (894)     | 2,880 (1,190)   | 2,400 (619)        | 2,970 (66.3)    | 2,660 (553)     | 0.47 (ns)          | 0.38 (ns)    | 0.12 (ns)    |
| CD6          | 224 (191)       | 427 (44.6)      | 530 (247)       | 264 (146)          | 877 (414)       | 567 (398)       | 1.13 (ns)          | 3.59 (ns)    | 1.85 (ns)    |
| Chemerin     | 35,700 (14,400) | 76,000 (16,100) | 62,100 (15,200) | 51,600 (16,600)    | 67,300 (29,700) | 43,600 (15,200) | 1.36 (ns)          | 3.52 (ns)    | 0.18 (ns)    |
| DAN          | 265 (152)       | 365 (219)       | 547 (180)       | 112 (96.7)         | 329 (253)       | 266 (222)       | 0.60 (ns)          | 2.02 (ns)    | 2.93 (ns)    |
| DLL4         | 901 (1,550)     | 3,660 (3,630)   | 3,430 (2,310)   | 4.5 (7.8)          | 2,680 (2,130)   | 6,420 (5,510)   | 0.83 (ns)          | 3.28 (ns)    | 0.067 (ns)   |
| Endocan      | 985 (609)       | 743 (631)       | 1,510 (561)     | 71.7 (124)         | 1,970 (1,920)   | 450 (738)       | 2.77 (ns)          | 1.16 (ns)    | 0.31 (ns)    |
| Fetuin A     | 68,700 (90,000) | 29,000 (22,500) | 37,500 (47,400) | 2,680 (592)        | 25,800 (18,300) | 18,100 (18,900) | 0.83 (ns)          | 0.068 (ns)   | 2.04 (ns)    |
| IL-33        | 157 (74.5)      | 80.9 (80.7)     | 150 (138)       | 63.7 (73.2)        | 182 (142)       | 146 (129)       | 1.16 (ns)          | 0.18 (ns)    | 0.00059 (ns) |
| IL-7 Ra      | 1,580 (922)     | 1,260 (728)     | 531 (257)       | 164 (266)          | 1,500 (1,610)   | 1,460 (1,250)   | 2.31 (ns)          | 0.45 (ns)    | 0.032 (ns)   |
| Limitin      | 47.4 (47.7)     | 59.5 (19.6)     | 71.0 (18.9)     | 36.8 (43.1)        | 55.8 (44.4)     | 67.5 (67.1)     | 0.013 (ns)         | 0.59 (ns)    | 0.084 (ns)   |
| Lipocalin-2  | 32,800 (32,800) | 43,300 (27,300) | 51,200 (29,400) | 8,740 (2,800)      | 46,000 (31,200) | 76,300 (22,400) | 1.31 (ns)          | 4.01 (≤0.05) | 0.01 (ns)    |
| Marapsin     | 344 (369)       | 384 (325)       | 385 (284)       | 76.8 (133)         | 223 (230)       | 531 (603)       | 0.55 (ns)          | 0.74 (ns)    | 0.32 (ns)    |
| Nope         | 15,500 (1,940)  | 14,800 (2,800)  | 15,800 (2,470)  | 12,600 (1,640)     | 13,200 (1,260)  | 15,100 (2,230)  | 0.41 (ns)          | 0.90 (ns)    | 3.01 (ns)    |
| NOV          | 6,530 (1,290)   | 8,600 (2,070)   | 7,340 (1,050)   | 6,390 (3,380)      | 8,680 (2,400)   | 7,020 (3,950)   | 0.0091 (ns)        | 1.12 (ns)    | 0.011 (ns)   |
| Osteoactivin | 1,890 (355)     | 2,610 (1,690)   | 2,670 (473)     | 2,380 (200)        | 2,950 (526)     | 3,830 (914)     | 0.39 (ns)          | 2.59 (ns)    | 2.73 (ns)    |
| OX40 Ligand  | 105 (56.5)      | 55.5 (32.0)     | 93.5 (27.0)     | 22.2 (20.4)        | 92.7 (61.2)     | 72.5 (40.0)     | 3.03 (ns)          | 0.32 (ns)    | 1.24 (ns)    |
| P-Cadherin   | 1,000 (324)     | 1,250 (261)     | 1,260 (520)     | 924 (71.5)         | 1,430 (530)     | 1,950 (271)     | 1.70 (ns)          | 4.68 (≤0.04) | 2.36 (ns)    |
| Renin 1      | 13,900 (1,130)  | 19,500 (7,180)  | 16,700 (2,490)  | 10,300 (2,390)     | 23,500 (6,140)  | 20,300 (9,750)  | 0.83 (ns)          | 4.20 (≤0.05) | 0.24 (ns)    |
| Testican 3   | 671 (502)       | 419 (192)       | 150 (51.2)      | 52.3 (46.3)        | 1,460 (1,880)   | 1,470 (1,430)   | 1.68 (ns)          | 0.56 (ns)    | 1.55 (ns)    |
| TIM-1        | 849 (453)       | 1,090 (523)     | 998 (299)       | 833 (301)          | 992 (662)       | 1,250 (1,000)   | 0.14 (ns)          | 0.36 (ns)    | 0.027 (ns)   |
| TRAIL        | 338 (165)       | 445 (597)       | 2,910 (4,560)   | 52,400 (90,700)    | 224 (203)       | 643 (803)       | 1.04 (ns)          | 0.93 (ns)    | 0.89 (ns)    |
| Tryptase E   | 978 (401)       | 1,370 (419)     | 1,470 (309)     | 321 (150)          | 813 (856)       | 1,140 (706)     | 0.15 (ns)          | 2.39 (ns)    | 4.24 (ns)    |

| Supplementary Table S9: Diet Dependent Differential Expression of RayBiotech Array 8 Proteins in WT and <i>Fmr1</i> <sup>KO</sup> Plasma. |                  |                  |                  |                    |                  |                 |                             |              |              |
|-------------------------------------------------------------------------------------------------------------------------------------------|------------------|------------------|------------------|--------------------|------------------|-----------------|-----------------------------|--------------|--------------|
| Protein                                                                                                                                   | WT (pg/mL, SD)   |                  |                  | Fmr1KO (pg/mL, SD) |                  |                 | 2-Way ANOVA, F ( <i>P</i> ) |              |              |
|                                                                                                                                           | 2019             | CIF              | SIF              | 2019               | CIF              | SIF             | Interaction                 | Diet         | Genotype     |
| 6Ckine                                                                                                                                    | 461 (114)        | 207 (107)        | 293 (169)        | 141 (92.2)         | 253 (68.4)       | 257 (44.9)      | 4.87 (≤0.03)                | 0.68 (ns)    | 4.23 (ns)    |
| Adiponectin                                                                                                                               | 5,050 (489)      | 4,910 (1,760)    | 4,380 (2,720)    | 5,530 (1,370)      | 4,620 (1,950)    | 4,110 (1,680)   | 0.090 (ns)                  | 0.51 (ns)    | 0.0010 (ns)  |
| ANGPTL3                                                                                                                                   | 115,000 (30,800) | 122,000 (14,400) | 115,000 (17,600) | 129,000 (20,800)   | 95,300 (41,600)  | 87,100 (17,700) | 1.30 (ns)                   | 1.03 (ns)    | 1.25 (ns)    |
| CCL28                                                                                                                                     | 395 (54.0)       | 297 (158)        | 389 (50.5)       | 335 (111)          | 447 (69.9)       | 523 (203)       | 1.38 (ns)                   | 1.04 (ns)    | 1.69 (ns)    |
| CD36                                                                                                                                      | 653 (49.2)       | 1,570 (117)      | 662 (522)        | 560 (134)          | 1,270 (471)      | 733 (720)       | 0.30 (ns)                   | 6.83 (≤0.01) | 0.30 (ns)    |
| Chordin                                                                                                                                   | 386 (77.0)       | 245 (137)        | 299 (139)        | 419 (91.5)         | 378 (138)        | 322 (139)       | 0.37 (ns)                   | 1.11 (ns)    | 1.18 (ns)    |
| CRP                                                                                                                                       | 2,400 (2,270)    | 1,060 (360)      | 2,520 (2,590)    | 1,230 (309)        | 891 (239)        | 854 (119)       | 0.43 (ns)                   | 0.61 (ns)    | 2.23 (ns)    |
| Epiregulin                                                                                                                                | 69,500 (16,300)  | 107,000 (15,000) | 83,100 (14,600)  | 64,700 (15,900)    | 101,000 (13,000) | 87,500 (39,300) | 0.11 (ns)                   | 4.59 (≤0.04) | 0.046 (ns)   |
| Fas                                                                                                                                       | 88.3 (31.0)      | 99.7 (29.4)      | 87.1 (11.1)      | 46.0 (21.3)        | 112 (76.0)       | 34.8 (18.3)     | 1.28 (ns)                   | 2.50 (ns)    | 2.39 (ns)    |
| Galectin-7                                                                                                                                | 951 (35.8)       | 416 (302)        | 524 (269)        | 321 (101)          | 567 (182)        | 344 (43.8)      | 6.58 (≤0.02)                | 1.86 (ns)    | 6.20 (≤0.03) |
| gp130                                                                                                                                     | 3,770 (493)      | 6,010 (2,670)    | 6,430 (1,320)    | 6,590 (3,470)      | 3,170 (996)      | 4,550 (1,490)   | 3.39 (ns)                   | 0.31 (ns)    | 0.44 (ns)    |
| MMP-2                                                                                                                                     | 3,770 (436)      | 3,470 (1,100)    | 3,890 (424)      | 3,440 (831)        | 3,980 (1,200)    | 3,380 (970)     | 0.57 (ns)                   | 0.030 (ns)   | 0.070 (ns)   |
| MMP-3                                                                                                                                     | 14,300 (4,290)   | 18,800 (3,000)   | 16,600 (5,320)   | 21,400 (3,940)     | 15,500 (4,580)   | 15,000 (5,760)  | 2.23 (ns)                   | 0.31 (ns)    | 0.12 (ns)    |
| MMP-10                                                                                                                                    | 176 (47.2)       | 744 (205)        | 365 (10.6)       | 254 (80.9)         | 419 (119)        | 311 (46.7)      | 5.65 (≤0.02)                | 18.6 (≤0.00) | 4.04 (ns)    |
| PDGF-AA                                                                                                                                   | 52.2 (18.2)      | 33.6 (11.9)      | 35.1 (15.5)      | 38.2 (37.8)        | 34.5 (19.2)      | 31.4 (13.3)     | 0.19 (ns)                   | 0.60 (ns)    | 0.32 (ns)    |
| Persephin                                                                                                                                 | 79.0 (30.3)      | 96.1 (15.4)      | 130 (71.4)       | 125 (56.7)         | 155 (68.1)       | 67.4 (34.7)     | 2.62 (ns)                   | 0.50 (ns)    | 0.35 (ns)    |
| sFRP-3                                                                                                                                    | 226 (145)        | 220 (142)        | 255 (138)        | 106 (31.4)         | 106 (90.3)       | 99.3 (86.2)     | 0.060 (ns)                  | 0.026 (ns)   | 5.93 (≤0.04) |
| Shh-N                                                                                                                                     | 139 (26.1)       | 132 (40.0)       | 143 (100)        | 75.1 (44.4)        | 70.4 (30.7)      | 147 (19.6)      | 0.86 (ns)                   | 1.31 (ns)    | 2.84 (ns)    |
| SLAM                                                                                                                                      | 1,730 (981)      | 1,740 (632)      | 950 (696)        | 1,340 (865)        | 445 (512)        | 1,030 (301)     | 1.49 (ns)                   | 1.03 (ns)    | 2.62 (ns)    |
| TGFb1                                                                                                                                     | 811 (229)        | 643 (150)        | 460 (334)        | 741 (241)          | 545 (129)        | 497 (208)       | 0.15 (ns)                   | 2.66 (ns)    | 0.17 (ns)    |
| TRANCE                                                                                                                                    | 662 (130)        | 486 (192)        | 433 (224)        | 257 (125)          | 550 (196)        | 239 (140)       | 2.80 (ns)                   | 1.75 (ns)    | 4.84 (≤0.05) |
| TremL1                                                                                                                                    | 1,570 (1,090)    | 3,120 (2,100)    | 1,330 (1,330)    | 3,150 (2,390)      | 1,510 (405)      | 1,620 (362)     | 1.73 (ns)                   | 0.67 (ns)    | 0.015 (ns)   |
| TWEAK                                                                                                                                     | 180 (94.6)       | 265 (43.7)       | 270 (29.4)       | 160 (53.2)         | 284 (139)        | 236 (137)       | 0.13 (ns)                   | 2.08 (ns)    | 0.070 (ns)   |
| VEGF-B                                                                                                                                    | 235 (65.2)       | 187 (91.3)       | 115 (61.9)       | 57.0 (22.8)        | 252 (113)        | 134 (71.9)      | 4.30 (≤0.04)                | 2.56 (ns)    | 0.76 (ns)    |

| <b>Supplementary Table S10: Y6FU Outcomes as a Function of Diet in Females.</b>                                                                                                                            |               |                         |                    |                     |
|------------------------------------------------------------------------------------------------------------------------------------------------------------------------------------------------------------|---------------|-------------------------|--------------------|---------------------|
| <b>Metric</b>                                                                                                                                                                                              | <b>Breast</b> | <b>Cow Milk Formula</b> | <b>Soy Formula</b> | <b><i>P</i></b>     |
| N                                                                                                                                                                                                          | 218           | 240                     | 15                 |                     |
| IEP                                                                                                                                                                                                        | 8.3%          | 14%                     | 6.7%               |                     |
| Speech Therapy                                                                                                                                                                                             | 7.3%          | 12%                     | 6.7%               |                     |
| Occupational Therapy                                                                                                                                                                                       | 2.3%          | 2.9%                    | 0%                 |                     |
| Help in School                                                                                                                                                                                             | 4.1%          | 9.6%                    | 6.7%               | 0.027 <sup>1</sup>  |
| Support in Classroom                                                                                                                                                                                       | 0.92%         | 2.1%                    | 6.7%               |                     |
| Hay Fever or Respiratory Allergy                                                                                                                                                                           | 17%           | 25%                     | 47%                | 0.0053 <sup>2</sup> |
| Asthma                                                                                                                                                                                                     | 6.4%          | 12%                     | 6.7%               |                     |
| ADD or ADHD                                                                                                                                                                                                | 0%            | 3.8%                    | 0%                 |                     |
| Autism or Developmental Delay                                                                                                                                                                              | 0.46%         | 1.3%                    | 0%                 |                     |
| <sup>1</sup> breast vs cow milk formula, Fisher exact test<br><sup>2</sup> $P=0.026$ breast vs cow milk formula, $P=0.0036$ breast vs soy formula, $P=0.064$ cow milk versus soy formula by Chi square 3x2 |               |                         |                    |                     |

| Supplementary Table S11: Y6FU Outcomes as a Function of Diet in Males.                                                                                                                                                                                                                                                                                                             |        |                  |             |                      |
|------------------------------------------------------------------------------------------------------------------------------------------------------------------------------------------------------------------------------------------------------------------------------------------------------------------------------------------------------------------------------------|--------|------------------|-------------|----------------------|
| Metric                                                                                                                                                                                                                                                                                                                                                                             | Breast | Cow Milk Formula | Soy Formula | <i>P</i>             |
| N                                                                                                                                                                                                                                                                                                                                                                                  | 201    | 215              | 21          |                      |
| IEP                                                                                                                                                                                                                                                                                                                                                                                | 12%    | 16%              | 24%         |                      |
| Speech Therapy                                                                                                                                                                                                                                                                                                                                                                     | 11%    | 18%              | 24%         |                      |
| Occupational Therapy                                                                                                                                                                                                                                                                                                                                                               | 4.5%   | 7.0%             | 14%         |                      |
| Help in School                                                                                                                                                                                                                                                                                                                                                                     | 7.0%   | 13%              | 24%         | 0.023 <sup>1,2</sup> |
| Support in Classroom                                                                                                                                                                                                                                                                                                                                                               | 4.5%   | 2.3%             | 19%         | 0.024 <sup>3,4</sup> |
| Hay Fever or Respiratory Allergy                                                                                                                                                                                                                                                                                                                                                   | 19%    | 24%              | 19%         |                      |
| Asthma                                                                                                                                                                                                                                                                                                                                                                             | 10%    | 14%              | 19%         |                      |
| ADD or ADHD                                                                                                                                                                                                                                                                                                                                                                        | 2.5%   | 6.5%             | 0%          |                      |
| Autism or Developmental Delay                                                                                                                                                                                                                                                                                                                                                      | 3.5%   | 6.1%             | 9.5%        |                      |
| <sup>1</sup> Chi Square 3x2<br><sup>2</sup> <i>P</i> =0.056 breast vs cow milk formula, <i>P</i> =0.0087 breast vs soy formula, <i>P</i> =0.15 cow milk vs soy formula by Chi square 2x2<br><sup>3</sup> breast vs soy formula, Fisher exact test<br><sup>4</sup> <i>P</i> =0.28 breast versus cow milk formula, <i>P</i> =0.0044 cow milk versus soy formula by Fisher exact test |        |                  |             |                      |
